# Supplementary material
Source: Research Square preprint supplement (doi:10.21203/rs.3.rs-9748915/v1)
Supplement: Supplementary file 1 [file 9f1ff5fe4db961a1b20235d7.pdf]

# Prevalence, diagnosis, treatment and control of hypertension among adults in rural India: results from the Indian Study of Healthy Ageing (Barshi)

## Supplementary Appendix, Table of Contents

|                                                                                                                                                                             | <b>Page</b> |
|-----------------------------------------------------------------------------------------------------------------------------------------------------------------------------|-------------|
| <b>Supplementary Figure S1.</b> Map showing locations of Solapur District and Barshi                                                                                        | 2           |
| <b>Supplementary Table S1.</b> Prevalence, diagnosis, treatment and control of hypertension, by selected characteristics (unadjusted)                                       | 3           |
| <b>Supplementary Table S2.</b> Prevalence, diagnosis, treatment and control of hypertension, by selected characteristics (using 2017 American Heart Association definition) | 4           |
| <b>Supplementary Table S3.</b> Prevalence, diagnosis, treatment and control of hypertension, by age and sex (using 2017 American Heart Association definition)              | 5           |
| <b>Supplementary Figure S2.</b> Prevalence, diagnosis, treatment and control of hypertension, by age and sex (using 2017 American Heart Association definition)             | 6           |

Supplementary Figure S1. Map showing locations of Solapur District and Barshi

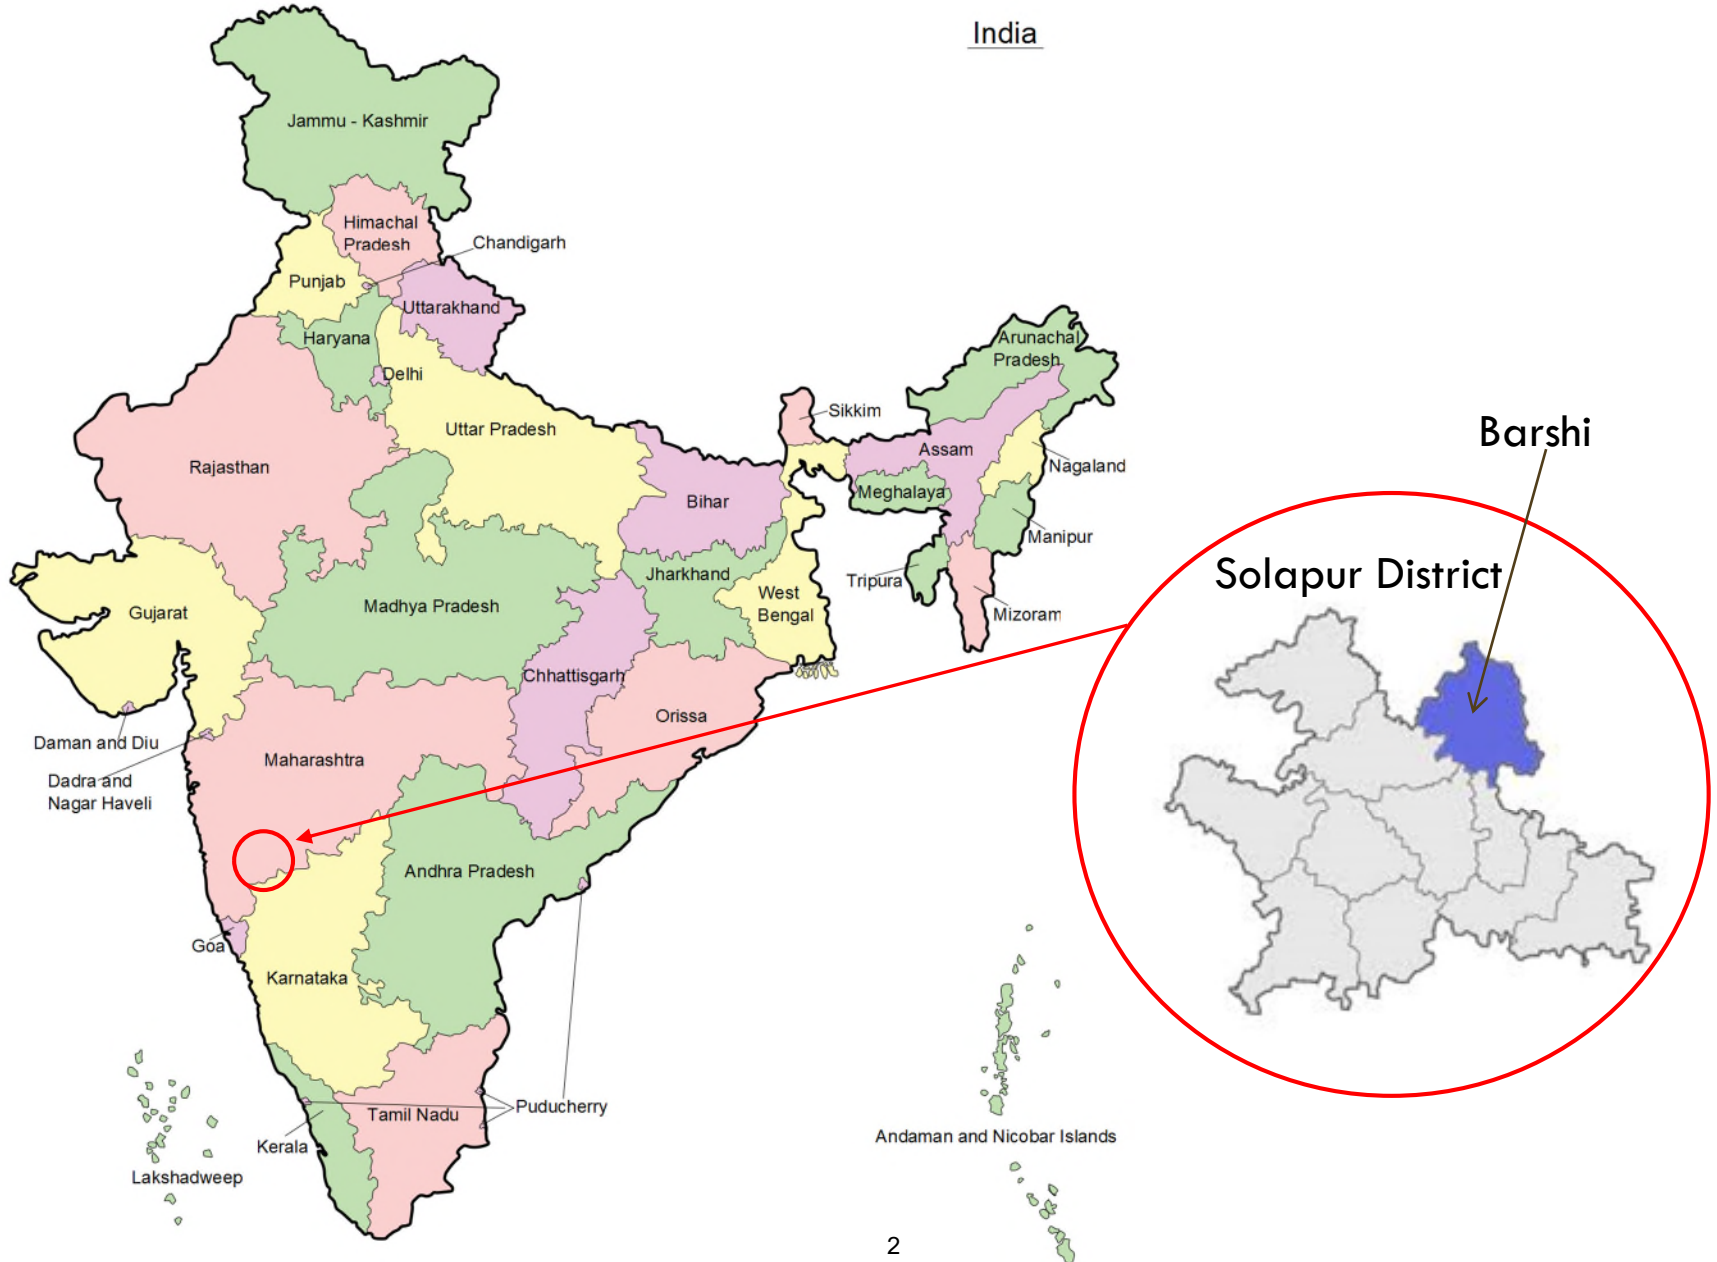

**Supplementary Table S1. Prevalence, diagnosis, treatment and control of hypertension, by selected characteristics (unadjusted)<sup>a</sup>**

| Characteristic                               | Number of participants | Prevalence of hypertension, % | Proportion of hypertension diagnosed, % | Proportion of diagnosed hypertension treated, % | Controlled hypertension, % |                        |  |
|----------------------------------------------|------------------------|-------------------------------|-----------------------------------------|-------------------------------------------------|----------------------------|------------------------|--|
|                                              |                        |                               |                                         |                                                 | Among treated              | Among all hypertension |  |
| <b>Sex</b>                                   |                        |                               |                                         |                                                 |                            |                        |  |
| Men                                          | 17 954                 | 30                            | 13                                      | 72                                              | 42                         | 4.1                    |  |
| Women                                        | 20 476                 | 32                            | 22                                      | 73                                              | 37                         | 5.8                    |  |
| <b>Age (years)</b>                           |                        |                               |                                         |                                                 |                            |                        |  |
| 30-39                                        | 12 541                 | 17                            | 9.4                                     | 48                                              | 46                         | 2.1                    |  |
| 40-49                                        | 10 076                 | 29                            | 14                                      | 62                                              | 50                         | 4.2                    |  |
| 50-59                                        | 8 773                  | 39                            | 20                                      | 77                                              | 38                         | 5.9                    |  |
| 60-69                                        | 7 040                  | 49                            | 25                                      | 81                                              | 34                         | 6.8                    |  |
| <b>Educational level</b>                     |                        |                               |                                         |                                                 |                            |                        |  |
| Less than primary school                     | 14 105                 | 35                            | 19                                      | 72                                              | 36                         | 4.8                    |  |
| Primary/middle school                        | 14 179                 | 29                            | 18                                      | 73                                              | 40                         | 5.2                    |  |
| More than middle school                      | 10 146                 | 29                            | 17                                      | 73                                              | 42                         | 5.2                    |  |
| <b>Prior CVD</b>                             |                        |                               |                                         |                                                 |                            |                        |  |
| No                                           | 37 899                 | 31                            | 17                                      | 72                                              | 39                         | 4.7                    |  |
| Yes                                          | 531                    | 57                            | 56                                      | 82                                              | 42                         | 19                     |  |
| <b>Season of data collection<sup>b</sup></b> |                        |                               |                                         |                                                 |                            |                        |  |
| Spring                                       | 3 260                  | 22                            | 18                                      | 76                                              | 35                         | 4.8                    |  |
| Summer                                       | 3 210                  | 24                            | 19                                      | 66                                              | 48                         | 5.9                    |  |
| Autumn                                       | 5 419                  | 32                            | 16                                      | 69                                              | 41                         | 4.5                    |  |
| Winter                                       | 26 541                 | 33                            | 18                                      | 74                                              | 38                         | 5.1                    |  |
| <b>Overall</b>                               | <b>38 430</b>          | <b>31</b>                     | <b>18</b>                               | <b>73</b>                                       | <b>39</b>                  | <b>5.0<sup>c</sup></b> |  |

Data are presented as unstandardised proportions. CVD = cardiovascular disease, defined as self-reported diagnosis of heart disease or stroke.

<sup>a</sup>Hypertension: measured systolic blood pressure (BP)  $\geq$  140 mmHg, diastolic BP  $\geq$  90 mmHg or self-reported hypertension. <sup>b</sup>Spring = March to May; summer = June to August; autumn = September to November; winter = December to February. <sup>c</sup>In addition 1.4% were diagnosed with hypertension but systolic BP measured < 140 mmHg and diastolic BP < 90 mmHg without treatment.

**Supplementary Table S2. Prevalence, diagnosis, treatment and control of hypertension, by selected characteristics (using 2017 American Heart Association definition<sup>a</sup>)**

| Characteristic                               | Number of participants | Prevalence of hypertension, % | Proportion of hypertension diagnosed, % | Proportion of diagnosed hypertension treated, % | Controlled hypertension, % |                                  |
|----------------------------------------------|------------------------|-------------------------------|-----------------------------------------|-------------------------------------------------|----------------------------|----------------------------------|
|                                              |                        |                               |                                         |                                                 | Among treated              | Among all hypertension           |
| <b>Sex</b>                                   |                        |                               |                                         |                                                 |                            |                                  |
| Men                                          | 17 954                 | 64 (63-65)                    | 6.3 (5.9-6.8)                           | 71 (68-75)                                      | 12.1 (9.3-14.9)            | 0.6 (0.4-0.7)                    |
| Women                                        | 20 476                 | 66 (65-66)                    | 10.5 (10.0-11.1)                        | 73 (71-75)                                      | 10.2 (8.4-12.1)            | 0.8 (0.6-0.9)                    |
| <b>Age (years)</b>                           |                        |                               |                                         |                                                 |                            |                                  |
| 30-39                                        | 12 541                 | 53 (52-54)                    | 3.1 (2.6-3.5)                           | 47 (40-54)                                      | 14.9 (8.0-21.8)            | 0.2 (0.1-0.4)                    |
| 40-49                                        | 10 076                 | 66 (65-67)                    | 6.0 (5.4-6.6)                           | 62 (57-67)                                      | 15.0 (10.5-19.4)           | 0.6 (0.4-0.7)                    |
| 50-59                                        | 8773                   | 72 (71-73)                    | 10.8 (10.1-11.6)                        | 77 (73-80)                                      | 10.6 (7.9-13.2)            | 0.9 (0.6-1.1)                    |
| 60-69                                        | 7040                   | 76 (75-77)                    | 16.1 (15.1-17.1)                        | 81 (78-83)                                      | 9.0 (6.9-11.2)             | 1.2 (0.9-1.5)                    |
| <b>Educational level</b>                     |                        |                               |                                         |                                                 |                            |                                  |
| Less than primary school                     | 14 105                 | 63 (62-64)                    | 7.1 (6.6-7.6)                           | 69 (65-73)                                      | 11.8 (8.3-15.4)            | 0.5 (0.4-0.7)                    |
| Primary/middle school                        | 14 179                 | 64 (64-65)                    | 9.1 (8.5-9.8)                           | 73 (70-77)                                      | 11.7 (8.9-14.5)            | 0.8 (0.6-1.0)                    |
| More than middle school                      | 10 146                 | 68 (67-69)                    | 12.9 (11.3-14.4)                        | 81 (76-85)                                      | 11.1 (6.4-15.7)            | 1.2 (0.6-1.7)                    |
| <b>Prior CVD</b>                             |                        |                               |                                         |                                                 |                            |                                  |
| No                                           | 37 899                 | 64 (64-65)                    | 6.3 (5.9-6.8)                           | 72 (70-74)                                      | 10.4 (8.8-12.0)            | 0.6 (0.5-0.7)                    |
| Yes                                          | 531                    | 71 (66-76)                    | 37.0 (31.6-42.4)                        | 80 (73-86)                                      | 16.6 (9.5-23.6)            | 5.0 (2.6-7.5)                    |
| <b>Season of data collection<sup>b</sup></b> |                        |                               |                                         |                                                 |                            |                                  |
| Spring                                       | 3260                   | 54 (52-55)                    | 7.9 (6.6-9.2)                           | 76 (69-83)                                      | 11.3 (4.9-17.6)            | 0.7 (0.3-1.1)                    |
| Summer                                       | 3210                   | 62 (60-64)                    | 9.3 (7.8-10.8)                          | 68 (60-76)                                      | 18.7 (10.6-26.9)           | 1.1 (0.6-1.7)                    |
| Autumn                                       | 5419                   | 67 (66-68)                    | 7.3 (6.5-8.2)                           | 68 (63-74)                                      | 13.5 (8.7-18.3)            | 0.7 (0.4-1.0)                    |
| Winter                                       | 26 541                 | 66 (65-66)                    | 8.9 (8.5-9.3)                           | 73 (71-76)                                      | 10.0 (8.3-11.7)            | 0.7 (0.5-0.8)                    |
| <b>Overall</b>                               | <b>38 430</b>          | <b>65 (64-65)</b>             | <b>8.6 (8.2-8.9)</b>                    | <b>73 (71-74)</b>                               | <b>11.0 (9.4-12.5)</b>     | <b>0.7 (0.6-0.8)<sup>c</sup></b> |

Data are presented as proportions with 95% confidence intervals in brackets. CVD = cardiovascular disease, defined as self-reported diagnosis of heart disease or stroke. <sup>a</sup>Hypertension: measured systolic blood pressure (BP)  $\geq$  130 mmHg, diastolic BP  $\geq$  80 mmHg or self-reported hypertension. Proportions are standardised for age and sex where appropriate. <sup>b</sup>Spring = March to May; summer = June to August; autumn = September to November; winter = December to February. <sup>c</sup>In addition 0.2% were diagnosed with hypertension but systolic BP measured < 130 mmHg and diastolic BP < 80 mm Hg without treatment.

**Supplementary Table S3. Prevalence, diagnosis, treatment and control of hypertension, by age and sex (using 2017 American Heart Association definition)<sup>a</sup>**

| Population    | Prevalence of hypertension |               | Proportion of hypertension diagnosed |               | Proportion of diagnosed hypertension treated |               | Controlled hypertension |               |                        |               |                        |
|---------------|----------------------------|---------------|--------------------------------------|---------------|----------------------------------------------|---------------|-------------------------|---------------|------------------------|---------------|------------------------|
|               | Number of participants     | Prevalence, % | Number of participants               | Proportion, % | Number of participants                       | Proportion, % | Among treated           |               | Among all hypertension |               |                        |
|               |                            |               |                                      |               |                                              |               | Number of participants  | Proportion, % | Number of participants | Proportion, % |                        |
| <b>Men</b>    |                            |               |                                      |               |                                              |               |                         |               |                        |               |                        |
| 30-39 (years) | 5679                       | 3224          | 57                                   | 80            | 2.5                                          | 44            | 55                      | 11            | 25                     | 11            | 0.3                    |
| 40-49 (years) | 4486                       | 2933          | 65                                   | 118           | 4.0                                          | 74            | 63                      | 13            | 18                     | 13            | 0.4                    |
| 50-59 (years) | 4080                       | 2736          | 67                                   | 220           | 8.0                                          | 165           | 75                      | 16            | 10                     | 16            | 0.6                    |
| 60-69 (years) | 3709                       | 2596          | 70                                   | 310           | 12                                           | 238           | 77                      | 24            | 10                     | 24            | 0.9                    |
| <b>All</b>    | <b>17 954</b>              | <b>11 489</b> | <b>64</b>                            | <b>728</b>    | <b>6.3</b>                                   | <b>521</b>    | <b>72</b>               | <b>64</b>     | <b>12</b>              | <b>64</b>     | <b>0.6<sup>b</sup></b> |
| <b>Women</b>  |                            |               |                                      |               |                                              |               |                         |               |                        |               |                        |
| 30-39 (years) | 6862                       | 3380          | 49                                   | 120           | 3.6                                          | 51            | 43                      | 5             | 10                     | 5             | 0.1                    |
| 40-49 (years) | 5590                       | 3714          | 66                                   | 286           | 7.7                                          | 176           | 62                      | 24            | 14                     | 24            | 0.6                    |
| 50-59 (years) | 4693                       | 3553          | 76                                   | 471           | 13                                           | 364           | 77                      | 40            | 11                     | 40            | 1.1                    |
| 60-69 (years) | 3331                       | 2685          | 81                                   | 527           | 20                                           | 437           | 83                      | 37            | 8.5                    | 37            | 1.4                    |
| <b>All</b>    | <b>20 476</b>              | <b>13 332</b> | <b>65</b>                            | <b>1404</b>   | <b>11</b>                                    | <b>1028</b>   | <b>73</b>               | <b>106</b>    | <b>10</b>              | <b>106</b>    | <b>0.8<sup>b</sup></b> |

<sup>a</sup>Hypertension: measured systolic blood pressure (BP)  $\geq$  130 mmHg, diastolic BP  $\geq$  80 mmHg or self-reported hypertension. <sup>b</sup>In addition 22 (0.1%) men and 36 (0.3%) women were diagnosed with hypertension but systolic BP measured  $<$  130 mmHg and diastolic BP  $<$  80 mmHg without treatment.

## Supplementary Figure S2. Prevalence, diagnosis, treatment and control of hypertension, by age and sex (using 2017 American Heart Association definition)

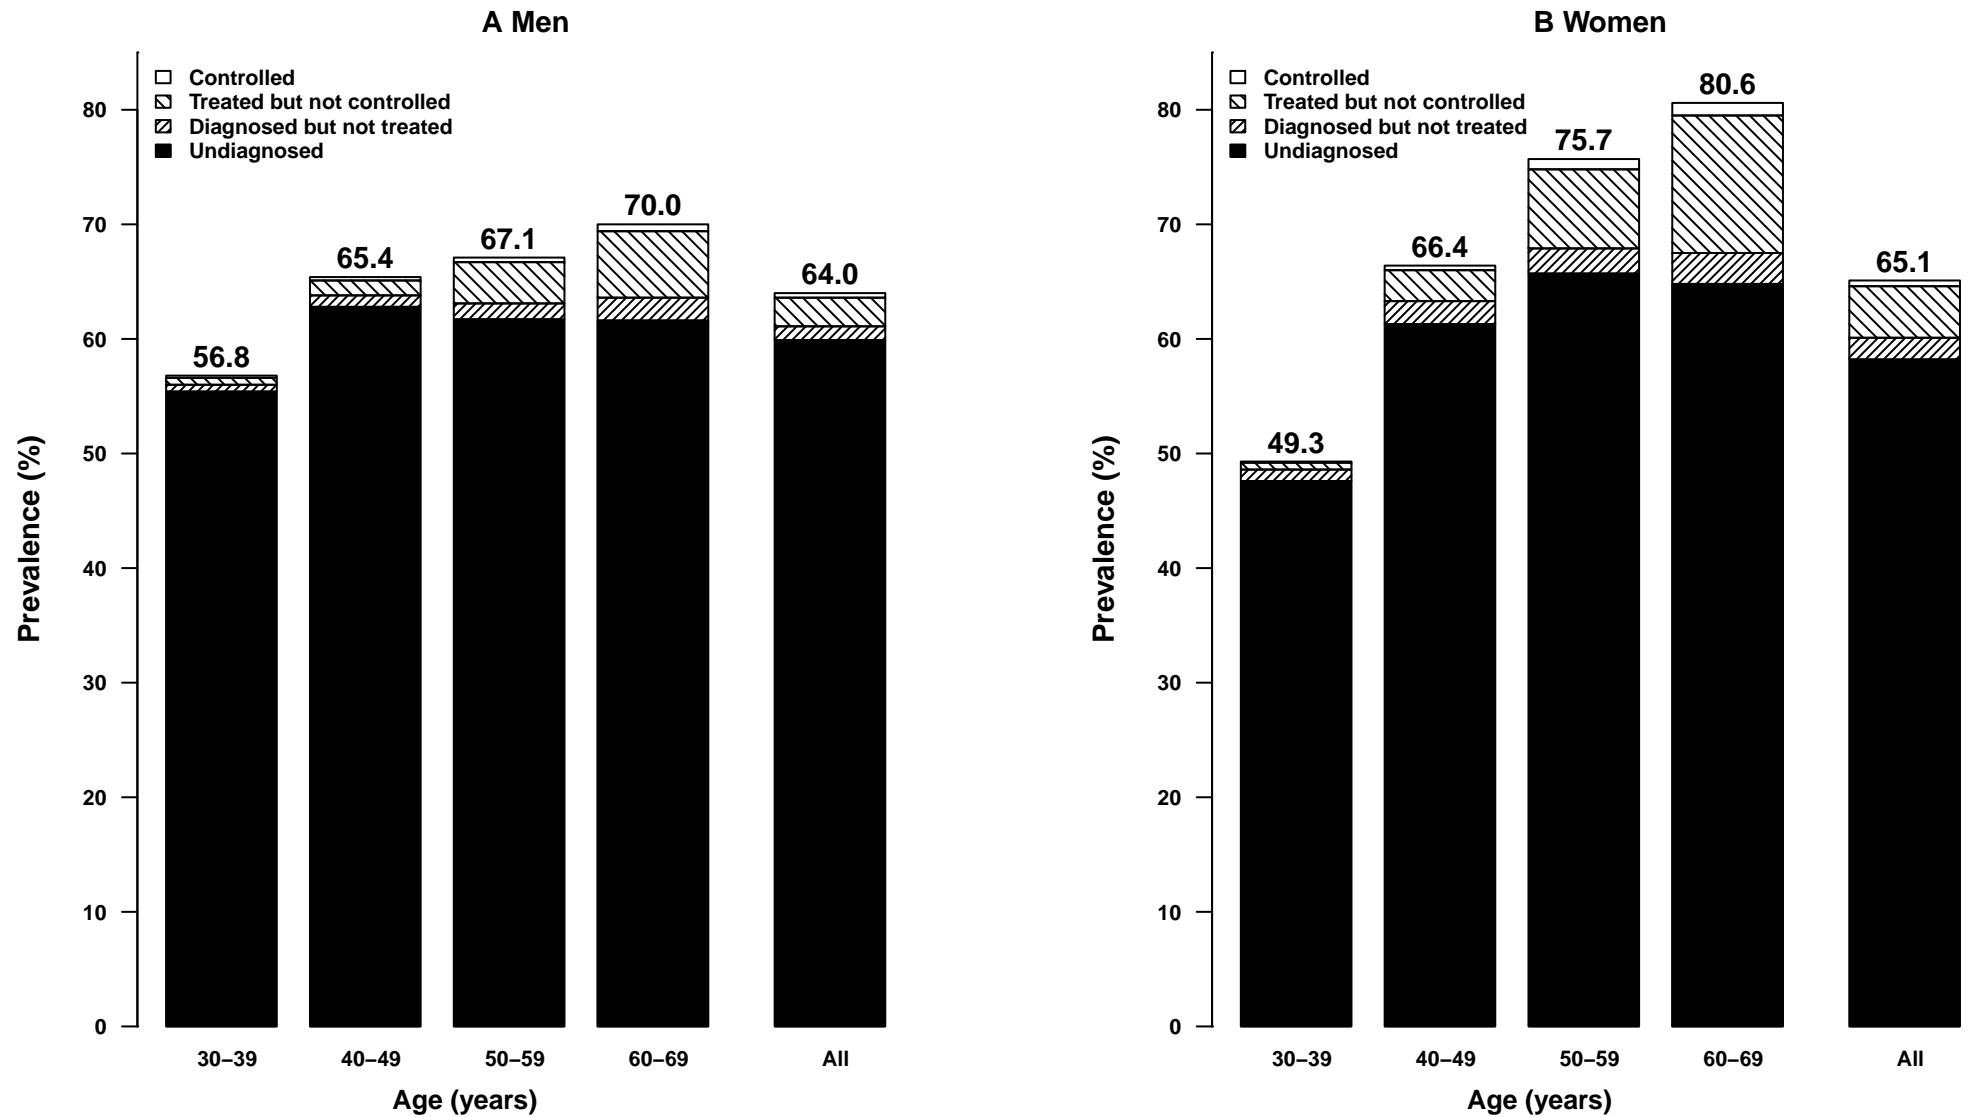

Hypertension: measured systolic blood pressure (BP)  $\geq 130$  mmHg, diastolic BP  $\geq 80$  mmHg or self-reported hypertension. Diagnosed hypertension: self-reported diagnosis of hypertension among those with hypertension. Treated hypertension: self-reported use of antihypertensive medication among those with diagnosed hypertension. Controlled hypertension: measured systolic BP  $<130$  mmHg and measured diastolic BP  $<80$  mmHg among those with treated hypertension. Numbers above the bars indicate the cumulative total prevalence of undiagnosed, diagnosed but not treated, treated but not controlled, and controlled hypertension.
